# Supplementary material for: On the Freezing Time of Supercooled Drops in Developing Convective Clouds
Source: Copernicus journal article supplement (doi:10.5194/acp-2017-714), 2017-09-15
Supplement: Supplementary file [file acp-2017-714-AC4-supplement.pdf]

1 **On the Freezing Time of Supercooled Drops in Developing**  
2 **Convective Clouds**

3

4 **Jing Yang<sup>1</sup>, Zhien Wang<sup>1</sup>, and Andrew Heymsfield<sup>2</sup>**

5 [1] {Department of Atmospheric Science, University of Wyoming, Laramie, WY}

6 [2] {National Center for Atmospheric Research, Boulder, CO}

7 Correspondence to: Zhien Wang (zwang@uwo.edu)

8

9 *Submitted to*

10 *Atmospheric Chemistry and Physics Discussion*

11

12 **Abstract**

13 Ice generation and evolution in convective clouds are still poorly understood and challenging to  
14 model. Aircraft measurements during the Ice in Clouds-Tropical (ICE-T) project suggest that the  
15 observed ice particles in intense convective clouds are primarily small at relatively warm  
16 temperature (between -7 °C and -10 °C), and large frozen drops are detected at a colder  
17 temperature than -10 °C. However, the ice particle size distributions (PSDs) between -7 °C and -  
18 10°C modelled using a parcel model containing a spectral bin microphysics scheme are much

- Deleted: In this study, the particle size distributions (PSDs) measured in fresh developing maritime convective clouds sampled during the Ice in Clouds-Tropical (ICE-T) project are shown and compared with the PSDs modeled using a parcel model containing a spectral bin microphysics scheme.
- Deleted: The observations aircraft
- Deleted: ed
- Deleted: "first ice"
- Deleted: is
- Deleted: with
- Deleted: e
- Deleted: ezing
- Deleted: were
- Deleted: On the other hand
- Deleted: .
- Deleted: but
- Deleted: .
- Deleted: .
- Deleted: .
- Deleted: PS

40 ~~broader than the observations~~. To interpret the ~~difference in the temperature-dependent ice PSD~~  
41 ~~evolution between the model simulations and the observations~~, the freezing times and  
42 temperatures of supercooled drops are ~~modeled and interpreted~~. The results indicate that the  
43 freezing time (~~from the initial nucleation to fully frozen~~) ~~must be considered; it is not~~  
44 ~~instantaneous, and is~~ longer for large drops than for small drops. ~~In strong updrafts, such as that~~  
45 ~~sampled by the Learjet during ICE-T~~, large freezing drops can be carried upwards to a lower  
46 temperature than their nucleation temperature before ~~they are fully frozen. This offers a feasible~~  
47 ~~explanation for the temperature-dependent ice particle size evolution in strong updrafts observed~~  
48 ~~during ICE-T~~. In models, drop freezing is ~~normally~~ assumed to be instantaneous, which is not  
49 realistic; the models yields broader ~~ice PSDs between -7 °C and -10 °C~~ than is observed. The  
50 ~~results highlight the importance to consider the freezing time of supercooled drops in interpreting~~  
51 the observed ~~and modelled~~ ice PSDs in fresh developing convective clouds ~~and in modelling ice~~  
52 ~~generation in cloud resolving models~~. To better understand the mechanisms of drop freezing and  
53 ice initiation in convective clouds, more laboratory experiments and in situ measurements are  
54 needed.

## 55 1. Introduction

56 Ice initiation in convective clouds is still not well understood (Cantrell and Heymsfield, 2005;  
57 Lawson et al., 2015; Yang et al., 2016), and it remains one of the main sources of uncertainties in  
58 numerical models (Khain et al., 2015). Observations suggest that ice initiation in convective  
59 clouds is strongly related to the freezing of supercooled drops ~~and the size of the freezing drops~~  
60 (Rangno and Hobbs, 2005; Lawson et al., 2015; Yang et al., 2016; Field et al., 2017).  
61 Supercooled drops do not fully freeze instantaneously, and ~~drops at the early stage of freezing~~  
62 ~~usually have little if any deformation (Johnson and Hallett, 1968; Murray and List, 1972;~~

- Deleted: at warm temperature
- Deleted: in convective clouds is small
- Deleted: size
- Deleted: s
- Deleted: ed ice PSDs
- Deleted: analyzed
- Deleted: freezing
- Deleted: but
- Deleted: it is
- Deleted: Due to instrumental limitations, freezing drops cannot be identified until they exhibit obvious shape deformation. If
- Deleted: the
- Deleted:
- Deleted: is strong enough
- Deleted: obvious shape deformation occurs
- Deleted: observed
- Deleted: size
- Deleted: observed
- Deleted: the
- Deleted: although there are still large uncertainties in ice generation mechanisms
- Deleted: thus,
- Deleted: a
- Deleted: "first ice"
- Deleted: is
- Deleted: study allows us to
- Deleted: modeled and the
- Deleted: from the perspective of the freezing time of supercooled drops and notes the deficiency of instantaneous drop freezing in models
- Deleted: in the future
- Formatted: Font: Not Bold

- Deleted: s
- Deleted: no or slight

96 [Hindmarsh et al., 2003](#), The freezing rate of supercooled drops depends on the rate of heat  
97 transfer between the drop and ambient air (Pruppacher and Klett, [2010](#)). Typically, the freezing  
98 process comprises four stages (Hindmarch et al., 2003): 1) the supercooling stage, during which  
99 a drop is supercooled to its nucleation temperature; 2) the recruescence stage, during which rapid  
100 kinetic ice nucleation occurs, which results in a rapid [rise](#) in temperature that is terminated when  
101 the drop temperature reaches 0 °C; 3) the freezing stage, during which the liquid part of a drop  
102 continuously freezes and the drop temperature remains at 0 °C; and 4) the cooling stage, during  
103 which the frozen drop cools to the ambient temperature.

**Deleted:** during airborne measurements, freezing drops cannot be observed until they have experienced obvious deformation

**Deleted:** 1997

104 A number of laboratory experiments have been performed to study the freezing of supercooled  
105 drops. For example, Johnson and Hallett (1968) showed that the freezing time of supercooled  
106 drops decreases with decreasing ambient temperature. They also showed that the freezing rate of  
107 supercooled drops is related to the composition of [the](#) air and that the freezing time of a  
108 millimeter-sized drop in helium and hydrogen is only one-fifth of that in air. Hindmarsh et al.  
109 (2003) showed that the freezing time increases with increasing drop size. In addition, Hindmarsh  
110 et al. (2003) used experimental results to discuss the accuracy of three drop freezing models: the  
111 uniform temperature model, the inward freezing model and the outward freezing model. All  
112 three of these models have fairly good accuracy in modeling drop temperatures and freezing  
113 times, and there are only minor differences between them.

**Deleted:** drop

**Deleted:** In typical air conditions, it takes approximately 400 s for a stationary millimeter-sized drop to completely freeze at -5 °C under a pressure of 1 atm; this freezing time is reduced to approximately 200 s at -10 °C.

114 In most numerical weather prediction models (NWPMs) and global climate models (GCMs), the  
115 freezing of supercooled drops is assumed to be instantaneous, because it is difficult to track the  
116 freezing stage of every particle in models and because there are no good observations with which  
117 to evaluate the modeled ice microphysics in detail. Phillips et al. (2015) implemented time-  
118 dependent freezing for raindrops in a cloud model using spectral bin microphysics (SBM). Their

127 sensitivity tests showed that time-dependent drop freezing delays the formation of hail in  
128 convective clouds; however, their model was unable to track the freezing stage of every particle.  
129 Using a simplified cloud parcel model and an electromagnetic scattering model, Kumjian et al.  
130 (2012) showed that the modeled radar polarimetric variables for convective clouds are more  
131 consistent with observations if time-dependent drop freezing is considered. However, drop  
132 freezing [in fresh developing convective clouds, such as the freezing time and the temperature of](#)  
133 [supercooled drops](#), has rarely been discussed.

134 Aircraft in situ measurements are [vital for improving](#) our current understanding of ice [generation](#)  
135 in convective clouds and to evaluate model simulations. Traditional in situ measurements can  
136 rarely identify ice that is smaller than [100 μm](#) in diameter. The 3-View Cloud Particle Imager  
137 (3V-CPI) is a good tool with which to record [images of](#) small particles, and it can be used to  
138 identify [the shapes of the](#) small ice (Lawson et al., 2015). During the Ice in Clouds-Topical (ICE-  
139 T) project, the 3V-CPI that was operated on the SPEC Learjet yielded high-resolution particle  
140 images and particle size distributions (PSDs). The 3V-CPI measurements suggest that the

141 observed [ice at relatively warm temperature \(about -8 °C\)](#) in fresh developing convective clouds  
142 are [primarily](#) small (Lawson et al., 2015); however, the results of some other studies have  
143 suggested that larger supercooled drops may freeze before smaller drops (Bigg, 1953;

144 Heymsfield, 2013). This raises the question: [are models able to capture the characteristics of the](#)  
145 [ice PSDs observed in developing convective clouds?](#) Understanding the freezing time of  
146 supercooled drops is helpful for interpreting the [difference between the observed and the](#)  
147 [modeled](#) ice PSDs in developing convective clouds. In addition, [the aircraft observations are](#)  
148 [useful for evaluating the impact of instantaneous drop freezing on the modeled PSDs.](#)

Deleted: in fresh developing convective clouds

Deleted: Thus, to better understand ice initiation in convective clouds and to evaluate the modeled microphysics, more observations are needed.

Deleted: necessary to improve

Deleted: initiation

Deleted: 200

Deleted: image

Deleted: "first ice"

Deleted: all

Deleted: ice

Deleted: why is the observed observed ice at relatively warm temperature "first ice" in convective updrafts small?

Deleted: Is

Deleted: A

Deleted: is

Deleted: to evaluate

166 This study aims to [better understand the impact of the freezing time and temperature of large](#)  
167 [supercooled drops on ice PSDs evolution in developing convective clouds](#). [Observed PSDs in](#)  
168 [developing convective clouds during the ICE-T project are used to evaluate the PSDs modelled](#)  
169 [by a parcel model, and the deficiency of instantaneous drop freezing in the model simulations are](#)  
170 [discussed based on the aircraft observation and quantitative calculations of the freezing time and](#)  
171 [temperature](#) of supercooled drops. This paper is organized as follows: Section 2 introduces the  
172 dataset and the analytical method; Section 3 discusses the results; and a summary is given in  
173 Section 4.

## 174 2. Dataset and Analysis Method

### 175 2.1 Calculation of the freezing time of supercooled drops

176 The calculation of the freezing time and temperature of supercooled drops is governed by a  
177 series of heat transfer and phase change equations. These detailed equations have been described  
178 in previous studies (e.g., Dye and Hobbs et al., 1968; [Heymsfield, 1982](#); Hindmarsh et al., 2003).

179 The drop temperature [increase](#) is balanced by convective heat transfer (i.e., ventilation), radiation  
180 and latent heat terms. In this calculation, a supercooled drop is assumed to be carried upward by  
181 an updraft, which ascends adiabatically. The terminal velocity of the drop follows that defined by  
182 Foote and Du Toit (1969). [Diffusional growth is included but coalescence is neglected.](#)

183 [Coalescence is the key process by which large supercooled drops develop in convective clouds.](#)  
184 [However, it is not necessary to include the coalescence process during the freezing of the drop in](#)  
185 [the calculation of the freezing time of a single supercooled drop, because the freezing time is the](#)  
186 [shortest assuming that drop size doesn't increase due to coalescence after freezing begins. The](#)  
187 [drop size increase due to coalescence process results in a longer freezing time. In this study, we](#)

**Deleted:** determining the size of "first ice" is important for understanding secondary ice generation process(es).

**Deleted:** analyze the o

**Deleted:** using the data collected

**Deleted:** . The observation is

**Deleted:** is

**Deleted:** , as well as to interpret these observations through the perspective of

**Deleted:** change

**Deleted:** In this calculation, d

**Deleted:** to generate

**Deleted:** .

**Deleted:** but

201 [prefer to examine the shortest freezing time of supercooled drop for a given size](#). The initial drop  
202 temperature is the same as the ambient air temperature. The temperature inside the drop is  
203 assumed to be uniform; this is a reasonable assumption because water and ice have a larger  
204 thermal conductivity than air and because of the internal mixing of liquid within the drop (Yao  
205 and Schrock, 1976). Hindmarsh et al. (2003) showed that including temperature variations inside  
206 the drop has a minor impact on the results. The freezing time is defined as the time period from  
207 the start to the end of the drop freezing.

## 208 2.2 Aircraft measurements during ICE-T

209 The ICE-T project was conducted in July 2011 over the Caribbean Sea, near the U.S. Virgin  
210 Islands; its goal was to study ice generation in tropical maritime convective clouds. Both the  
211 National Center for Atmospheric Research (NCAR) C-130 aircraft and the SPEC Incorporated  
212 Learjet were deployed during ICE-T.

213 The SPEC Learjet was equipped with [the state-of-art instruments that were used to study the](#)  
214 microphysics in convective clouds during ICE-T. The primary [objective of the Learjet was to](#)  
215 [make rapid, repeated penetrations in the updrafts of growing turrets](#). The instruments included a  
216 fast forward-scattering spectrometer probe (FFSSP); a CPI; a two-dimensional stereo (2D-S)  
217 probe; a high-volume precipitation spectrometer (HVPS-3), and a Rosemount temperature probe.  
218 The measurements obtained using the FFSSP, CPI, 2D-S, and HVPS were combined to generate  
219 the PSDs. CPI images were used to identify liquid drops and ice particles that were smaller than  
220 500  $\mu\text{m}$  in diameter, and these percentages of drops and ice particles were applied to the 2D-S  
221 PSDs. The 2D-S and HVPS images were used to identify drops and ice particles that were larger  
222 than 500  $\mu\text{m}$  in diameter. More information about the processing of the Learjet data can be found

Deleted: various

Deleted: goal of the Learjet was to make repeated penetrations in fresh developing convective updrafts near the cloud top

Deleted: se

227 in Lawson et al. (2015).

228 The NCAR C-130 was not used to repeatedly penetrate fresh developing convective clouds  
229 during ICE-T; instead, it penetrated convective clouds at different stages of their development.

230 Most of these penetrations occurred far below the cloud top, although some were near the cloud

231 top (Heymsfield et al., 2014; [Yang et al., 2016](#)). The [C-130](#) instruments included [a Forward](#)

232 [Scattering Spectrometer Probe \(FSSP\)](#), a two-dimensional cloud (2D-C) probe, a two-

233 dimensional precipitation (2D-P) probe, and a Rosemount temperature probe. The Wyoming

234 Cloud Radar (WCR; Wang et al. 2012) was operated on the C-130 to obtain 2D reflectivity

235 structures, and the Wyoming Cloud Lidar (WCL; Wang et al. 2009) was used to identify liquid-

236 dominated and ice-dominated clouds.

### 237 2.3 Parcel model simulation

238 In this study, we compare the PSDs modeled using a parcel model containing SBM to those

239 observed [by](#) the aircraft. The SBM was developed by Hebrew University (Khain et al., 2000) and

240 has been implemented in the Weather Forecast and Research model (WRF; Lynn et al., 2005).

241 Time-dependent drop freezing is not included in this scheme. The purpose of this simulation is

242 not to evaluate the modeled [ice concentration](#) using observations, but instead to [identify the](#)

243 [extent of the](#) deficiency of instantaneous drop freezing in SBM. The modeled parcel has a depth

244 of 500 m. The observed drop size distribution at -6 °C is used as an input. [The observed mean](#)

245 [vertical velocity in the updrafts sampled by the Learjet is used in the simulation](#). The

246 hydrometeor types include cloud drop/rain, ice/snow, and graupel; the PSD of each hydrometeor

247 type has 33 mass bins. The ice nucleation mechanisms include immersion freezing using [the](#)

248 [Bigg](#) parameterization (1953), deposition/condensation nucleation (Meyer et al., 1992), contact

Deleted: used here

Deleted: an FSSP

Deleted: results

Deleted: reveal

Deleted: and its inability to capture the observed rapid ice generation

Deleted: The vertical air velocity is 10 m/s, which is a typical mean updraft strength in the convective clouds sampled during ICE-T

Deleted: , which is temperature-dependent,

Deleted: 's

260 nucleation (Meyer et al., 1992), and the Hallett-Mossop process (Hallett and Mossop, 1974).  
261 Other ice microphysics processes include riming, coalescence and diffusional growth. During  
262 every time step, 1% of the aerosols in the ambient air are assumed to become entrained into the  
263 cloud parcel. The ambient aerosol size distribution is observed using a high-flow dual-channel  
264 differential mobility analyzer (HDDMA; DeMott et al., 2016) and a Passive Cavity Aerosol  
265 Spectrometer Probe (PCASP; Baumgardner et al., 2011) operated on the C-130.

### 266 3. Results and Discussion

#### 267 3.1 Comparison of observed and modeled particle size distributions

268 Fig. 1 shows the PSDs measured by the Learjet and those modeled using a parcel model with  
269 SBM. The observed mean vertical velocity and averaged maximum vertical velocity are shown  
270 in Fig. 1a-e. The averaged maximum vertical velocity is the mean value of the maximum vertical  
271 velocities in all penetrations for a given temperature range; each penetration has one value of  
272 maximum vertical velocity. The simulation data on the left panels include all of the ice physics  
273 implemented in the SBM, while drop-ice collision is turned off for the right panels. The  
274 modelled ice concentration is much lower than that observed by the Learjet, this may be because  
275 there are ice generation mechanisms not implemented in the model, such as ice multiplication  
276 due to large drop freezing (Lawson et al., 2015). Here we do not focus on the ice concentration  
277 but the size of ice. The Learjet measurements suggest that the ice particles observed in fresh  
278 developing convective clouds are relatively small (20-300  $\mu\text{m}$  in diameter) between  $-7^\circ\text{C}$  and -  
279  $10^\circ\text{C}$  and that the ice PSD broadens as the temperature decreases. If drop-ice collisions are  
280 excluded, most of the modeled ice is small at warm temperatures, consistent with observation  
281 (Fig. 1h and i), only a very low concentration of large ice is found, which is from immersion

Deleted: size distributions

Deleted: .

Deleted: liquid

Deleted: of ic

Deleted: is

Deleted: are



288 [freezing](#). The deposition/condensation nucleation exhibits the largest contribution to the  
 289 modelled ice (Fig. 1f-i). Immersion freezing and contact freezing contribute less to the modeled  
 290 ice PSDs. If drop-ice collision is implemented, the concentration of large ice suddenly increases  
 291 by 2 orders of magnitude at temperature between -7 °C and -10 °C (Fig. 1c and d), results in  
 292 much broader ice PSDs than observed, indicating these large ice are from the drop-ice collision  
 293 process, and are added to the ice PSDs as soon as the large drops collide with small ice  
 294 assuming instantaneous freezing.

295 In real convective clouds, large drops do not freeze instantaneously after they are nucleated. At  
 296 the early stage of freezing, large drops remain spherical or quasi-spherical (Johnson and Hallett,  
 297 1968; Murray and List, 1972; Hindmarsh et al., 2003), and probably contain more liquid mass  
 298 than ice mass, so they may be regarded as liquid in the observations. Previous studies suggest it  
 299 may take tens of seconds for a millimeter supercooled drop to complete freezing (Hindmarsh et  
 300 al., 2003). Therefore, in strong updrafts, such as those sampled by the Learjet during ICE-T,  
 301 large drops that start to freeze at warm temperatures may be fully frozen at temperatures colder  
 302 than the initial nucleation temperature. However, in models, drop freezing is assumed  
 303 instantaneous, so the modeled ice PSDs are much broader than observed between -7 °C and -  
 304 10 °C (Fig. 1).

305 Examples of [ice \(and freezing drop\)](#) images collected by the 2D-C on the C-130 and the CPI on  
 306 the Learjet are shown in Fig. 2. Both the 2D-C and CPI images were measured near the cloud top  
 307 in the updraft cores of developing convective clouds. As noted in the figure, the observed  
 308 particles are mostly small between -8 °C and -10 °C (Fig. 2c). Some particles may be small drops  
 309 at the early stage of freezing because they exhibit slight shape deformation, as shown by the  
 310 particle images in the red box in Fig. 2c; however, we have no other evidence with which to

|                                                                                                                                                                                                                                                                                                                                                                                                                                                                                                                                                                                                                                                                                                                                                                                                                                                                                                                                                                                                                                                                                                                                                                                                                                                                                                                                                                                                                                                                                                                                                                                                                                                                                                                                                                                         |
|-----------------------------------------------------------------------------------------------------------------------------------------------------------------------------------------------------------------------------------------------------------------------------------------------------------------------------------------------------------------------------------------------------------------------------------------------------------------------------------------------------------------------------------------------------------------------------------------------------------------------------------------------------------------------------------------------------------------------------------------------------------------------------------------------------------------------------------------------------------------------------------------------------------------------------------------------------------------------------------------------------------------------------------------------------------------------------------------------------------------------------------------------------------------------------------------------------------------------------------------------------------------------------------------------------------------------------------------------------------------------------------------------------------------------------------------------------------------------------------------------------------------------------------------------------------------------------------------------------------------------------------------------------------------------------------------------------------------------------------------------------------------------------------------|
| <b>Deleted:</b> 3                                                                                                                                                                                                                                                                                                                                                                                                                                                                                                                                                                                                                                                                                                                                                                                                                                                                                                                                                                                                                                                                                                                                                                                                                                                                                                                                                                                                                                                                                                                                                                                                                                                                                                                                                                       |
| <b>Deleted:</b> that                                                                                                                                                                                                                                                                                                                                                                                                                                                                                                                                                                                                                                                                                                                                                                                                                                                                                                                                                                                                                                                                                                                                                                                                                                                                                                                                                                                                                                                                                                                                                                                                                                                                                                                                                                    |
| <b>Deleted:</b>                                                                                                                                                                                                                                                                                                                                                                                                                                                                                                                                                                                                                                                                                                                                                                                                                                                                                                                                                                                                                                                                                                                                                                                                                                                                                                                                                                                                                                                                                                                                                                                                                                                                                                                                                                         |
| <b>Deleted:</b> and                                                                                                                                                                                                                                                                                                                                                                                                                                                                                                                                                                                                                                                                                                                                                                                                                                                                                                                                                                                                                                                                                                                                                                                                                                                                                                                                                                                                                                                                                                                                                                                                                                                                                                                                                                     |
| <b>Deleted:</b> they are                                                                                                                                                                                                                                                                                                                                                                                                                                                                                                                                                                                                                                                                                                                                                                                                                                                                                                                                                                                                                                                                                                                                                                                                                                                                                                                                                                                                                                                                                                                                                                                                                                                                                                                                                                |
| <b>Deleted:</b> collided                                                                                                                                                                                                                                                                                                                                                                                                                                                                                                                                                                                                                                                                                                                                                                                                                                                                                                                                                                                                                                                                                                                                                                                                                                                                                                                                                                                                                                                                                                                                                                                                                                                                                                                                                                |
| <b>Deleted:</b> nucleated                                                                                                                                                                                                                                                                                                                                                                                                                                                                                                                                                                                                                                                                                                                                                                                                                                                                                                                                                                                                                                                                                                                                                                                                                                                                                                                                                                                                                                                                                                                                                                                                                                                                                                                                                               |
| <b>Deleted:</b> The modeled ice PSD is much broader than that observed between -7 °C and -10 °C. The deposition/condensation nucleation exhibits the largest contribution to the modeled ice PSDs (Fig. 1d). Immersion freezing, contact freezing and the Hallett-Mossop process contribute less to the modeled ice PSDs. Small ice particles are mostly formed by deposition/condensation nucleation, whereas large ice is produced by immersion freezing and drop-ice collision (Fig. 1d and h).                                                                                                                                                                                                                                                                                                                                                                                                                                                                                                                                                                                                                                                                                                                                                                                                                                                                                                                                                                                                                                                                                                                                                                                                                                                                                      |
| <b>Deleted:</b> are                                                                                                                                                                                                                                                                                                                                                                                                                                                                                                                                                                                                                                                                                                                                                                                                                                                                                                                                                                                                                                                                                                                                                                                                                                                                                                                                                                                                                                                                                                                                                                                                                                                                                                                                                                     |
| <b>Deleted:</b> not                                                                                                                                                                                                                                                                                                                                                                                                                                                                                                                                                                                                                                                                                                                                                                                                                                                                                                                                                                                                                                                                                                                                                                                                                                                                                                                                                                                                                                                                                                                                                                                                                                                                                                                                                                     |
| <b>Deleted:</b> ice                                                                                                                                                                                                                                                                                                                                                                                                                                                                                                                                                                                                                                                                                                                                                                                                                                                                                                                                                                                                                                                                                                                                                                                                                                                                                                                                                                                                                                                                                                                                                                                                                                                                                                                                                                     |
| <b>Deleted:</b> ose                                                                                                                                                                                                                                                                                                                                                                                                                                                                                                                                                                                                                                                                                                                                                                                                                                                                                                                                                                                                                                                                                                                                                                                                                                                                                                                                                                                                                                                                                                                                                                                                                                                                                                                                                                     |
| <b>Deleted:</b> at                                                                                                                                                                                                                                                                                                                                                                                                                                                                                                                                                                                                                                                                                                                                                                                                                                                                                                                                                                                                                                                                                                                                                                                                                                                                                                                                                                                                                                                                                                                                                                                                                                                                                                                                                                      |
| <b>Deleted:</b> which                                                                                                                                                                                                                                                                                                                                                                                                                                                                                                                                                                                                                                                                                                                                                                                                                                                                                                                                                                                                                                                                                                                                                                                                                                                                                                                                                                                                                                                                                                                                                                                                                                                                                                                                                                   |
| <b>Deleted:</b> ing                                                                                                                                                                                                                                                                                                                                                                                                                                                                                                                                                                                                                                                                                                                                                                                                                                                                                                                                                                                                                                                                                                                                                                                                                                                                                                                                                                                                                                                                                                                                                                                                                                                                                                                                                                     |
| <b>Deleted:</b> ing                                                                                                                                                                                                                                                                                                                                                                                                                                                                                                                                                                                                                                                                                                                                                                                                                                                                                                                                                                                                                                                                                                                                                                                                                                                                                                                                                                                                                                                                                                                                                                                                                                                                                                                                                                     |
| <b>Deleted:</b> l                                                                                                                                                                                                                                                                                                                                                                                                                                                                                                                                                                                                                                                                                                                                                                                                                                                                                                                                                                                                                                                                                                                                                                                                                                                                                                                                                                                                                                                                                                                                                                                                                                                                                                                                                                       |
| <b>Deleted:</b> Previous studies have suggested that during immersion freezing, large drops have a higher probability of freezing than small drops at the same temperature (Bigg, 1953). In addition, small ice that is generated by other mechanisms (e.g., deposition/condensation nucleation, secondary ice) can be quickly collected by large drops in convective clouds, which results in the freezing of large drops. An obvious difference between the observed and modeled ice PSDs is that large ice is not observed between -7 °C and -10 °C but is found in the modeled results (Fig. 1d). There are three possible explanations for this: first, large freezing (or frozen) drops cannot be identified from the images taken by the probes, or the sampling volume of the probes is too small; second, the modeled results are not realistic; third, there could be a combination of the first and second possibilities. There is no evidence that large drops do not freeze between -7 °C and -10 °C. In the observations, only non-spherical particles are regarded as ice, but freezing drops exhibit no (obvious) shape deformation during the early stage of freezing (Johnson and Hallett, 1968; Hindmarsh et al., 2003). Due to the limitations of the instruments, freezing drops that do not exhibit obvious shape deformation cannot be identified; thus, the first possibility may apply. On the other hand, in the model simulations, drop freezing is assumed to be instantaneous, which could result in a broad ice PSD at warm temperatures; because this is not true in natural clouds, the second possibility may also apply. Therefore, the large difference between the measured and simulated ice PSDs is probably both observation- and model-related. |
| <b>Deleted:</b> particle                                                                                                                                                                                                                                                                                                                                                                                                                                                                                                                                                                                                                                                                                                                                                                                                                                                                                                                                                                                                                                                                                                                                                                                                                                                                                                                                                                                                                                                                                                                                                                                                                                                                                                                                                                |
| <b>Deleted:</b> ice                                                                                                                                                                                                                                                                                                                                                                                                                                                                                                                                                                                                                                                                                                                                                                                                                                                                                                                                                                                                                                                                                                                                                                                                                                                                                                                                                                                                                                                                                                                                                                                                                                                                                                                                                                     |
| <b>Deleted:</b> comprise small frozen drops                                                                                                                                                                                                                                                                                                                                                                                                                                                                                                                                                                                                                                                                                                                                                                                                                                                                                                                                                                                                                                                                                                                                                                                                                                                                                                                                                                                                                                                                                                                                                                                                                                                                                                                                             |
| <b>Deleted:</b> have just begun freezing                                                                                                                                                                                                                                                                                                                                                                                                                                                                                                                                                                                                                                                                                                                                                                                                                                                                                                                                                                                                                                                                                                                                                                                                                                                                                                                                                                                                                                                                                                                                                                                                                                                                                                                                                |

365 confirm this. Between -10 °C and -13 °C, we observe more ice particles, including both large  
366 [frozen drops](#) and small [ice](#), as well as rimed graupel (Fig. 2a and b). Columns and plates were  
367 also observed. Considering the time that is needed for columns and plates to grow [and the](#)  
368 [freezing time of large frozen drops](#), they were probably [nucleated](#) at a warmer temperature than  
369 is observed. Due to the relatively low resolution of the 2D-S, 2D-C, HVPS and 2D-P images,  
370 large drops [at the early stage of freezing](#) that exhibit no obvious shape deformation are regarded  
371 as drops [rather than ice](#).

Deleted: frozen drops  
Deleted: s

Deleted: generated

Deleted: freezing (or frozen)  
Deleted: cannot be identified, and they  
Deleted: thus  
Deleted: In some spherical CPI particle images, it is also difficult to determine whether the particles have begun freezing or not, because freezing drops exhibit no (or no obvious) shape deformation during the early stages of freezing (e.g., Johnson and Hallett, 1968; Hindmarsh et al., 2003).

### 372 3.2 Freezing time of supercooled drops

373 To better [interpret the freezing of large supercooled drops in strong updrafts](#), we analyze the  
374 freezing time [and temperature](#) of supercooled drops in this section. Fig. 3 shows the changes in  
375 drop temperature and ice mass fraction [as functions of time and ambient temperature](#). The  
376 updraft velocity [used in the calculation](#) is [the observed temperature-dependent mean vertical](#)  
377 [velocity that shown in Fig. 1a-e](#). Drops and air parcels ascend from -6 °C (~520 mb, ~5600 m).  
378 The nucleation temperature, which is the temperature at which drops begin to freeze, is assumed  
379 to be -8 °C. The figure demonstrates that a drop with a radius of 100 µm cools from -6 °C to -  
380 8 °C and begins to freeze at approximately [22 s](#). The latent heat released due to freezing leads to  
381 a sudden [rise](#) in temperature from -8 °C to 0 °C (Fig. 3a), and the ice mass fraction increases  
382 from 0 to 0.1 (Fig. 3b). It takes approximately [5](#) seconds for the drop to fully freeze; during  
383 freezing, the drop temperature remains at 0 °C (Fig. 3a), and the ice mass fraction continuously  
384 increases (Fig. 3b). After completely freezing, the frozen drop rapidly cools due to the large  
385 difference between the ambient temperature and the drop surface temperature. The cooling rate  
386 slows down when the frozen drop temperature approaches the ambient temperature. According

Deleted: understand  
Deleted: impact of  
Deleted: time  
Deleted:  
Deleted: on the modelled ice PSDs  
Deleted: the observed PSDs,  
Deleted: , nucleation temperature  
Deleted: frozen  
Deleted: with changes in  
Deleted: assumed to be 10 m/s

Deleted: 23

Deleted: drop

Deleted: 4

411 to ~~the~~ equations, the cooling rate for a drop in the updraft is largely controlled by convective heat  
412 transfer, rather than radiation or diffusional growth. If significant riming occurs on the freezing  
413 (frozen) drop surface, the cooling rate could be slower, and the freezing time could thus be  
414 longer due to the latent heat release that occurs during riming (Heymsfield, 1982; Phillips et al.,  
415 2015). The drop temperature changes in a similar way for larger drops as it does for small drops.  
416 However, due to their higher terminal velocity, it takes longer for larger drops to reach their  
417 nucleation temperature (-8 °C). Drops with radii of 250  $\mu\text{m}$  and 500  $\mu\text{m}$  begin to freeze at 28 s  
418 and 41 s, respectively (Fig. 3a), and ~~the~~ ambient temperatures are approximately -8.1 °C and -  
419 8.2 °C (Fig. 3c), respectively, ~~which is slightly colder than the drop temperature because of the~~  
420 ~~gradual heat transfer from drop to air~~. In addition, it takes longer for larger drops to completely  
421 freeze. Drops with radii of 250  $\mu\text{m}$  and 500  $\mu\text{m}$  require approximately 15 s and 34 s,  
422 respectively, to fully freeze (Fig. 3a); these frozen drops are found at temperatures of -9.4 °C and  
423 -10.18 °C, respectively (Fig. 3c).

424 Fig. 4 shows the freezing time and frozen temperature as functions of the drop radius for  
425 different vertical air velocities and nucleation temperatures. The freezing time represents the  
426 time period from the start of drop freezing to the end of drop freezing. The figure shows that the  
427 freezing time increases as the radius increases. For the same nucleation temperature, drops freeze  
428 faster in stronger updrafts than they do in weaker ones ~~because of the greater difference between~~  
429 ~~the particle and air temperatures~~ (Fig. 4a); however, their frozen temperatures are colder in  
430 stronger updrafts (Fig. 4b). In addition, for the same updraft strength, a drop freezes faster when  
431 its nucleation temperature is lower, and it fully freezes at colder temperatures. Moreover, for the  
432 same drop radius, the effect of the updraft strength on the freezing time is smaller if a drop  
433 nucleates at a lower temperature, as is indicated by the smaller differences between the solid,

Deleted: its

Deleted:  $\mu$

Deleted: 43

Deleted: their

Deleted: 8.15

Deleted: are

Deleted: 35

Deleted: 9.2

Deleted: 9

Deleted: 2

Deleted: .95

Deleted: the faster heat transfer rate

446 dashed and dotted lines for colder nucleation temperatures (Fig. 4a); however, its impact on  
447 frozen temperature does not vary substantially with different nucleation temperatures (Fig. 4b).  
448 Calculations of the freezing time and frozen temperature based on the observed temperature-  
449 dependent mean vertical velocity and the averaged maximum vertical velocity provide similar  
450 information (Fig. 4c and d). Between -7 °C and -10 °C, the observed vertical velocity is strong,  
451 so for drops larger than 400 μm in radius which start freezing at -6 °C or -8 °C, the frozen  
452 temperature is 2–3 degrees colder than the nucleation temperature. The mean vertical velocity at  
453 temperature colder than -10 °C is weaker than that between -7 °C and -10 °C, so for drops that  
454 start freezing at -10 °C, the freezing temperature is similar to the nucleation temperature (solid  
455 green line in Fig. 4d). This suggests the large frozen drops observed at -10 °C may start freezing  
456 at a temperature either warmer than or similar to -10 °C. While for the averaged maximum  
457 vertical velocity, the frozen temperature is about 1–2 degrees colder than the nucleation  
458 temperature (-10 °C) for drops with radius of 500–1000 μm.  
459 According to Bigg (1953), large drops may begin to freeze at warmer temperatures than small  
460 drops because large drops have higher probability of containing immersion ice nuclei for a given  
461 temperature (Khain et al., 2000). Fig. 5 shows the nucleation temperature and frozen temperature  
462 as functions of the drop radius. The nucleation temperature is the temperature at which drops  
463 have a 10<sup>-4</sup>% probability of freezing, as determined based on Bigg’s parametrization for  
464 immersion freezing. This probability is low because of the low concentration of immersion ice  
465 nuclei that are present at warm temperatures. The figure shows that large drops may begin to  
466 freeze at warmer temperatures than small drops; however, due to their longer freezing times,  
467 large drops may fully freeze at colder temperatures than small drops if the updraft is strong  
468 enough. Immersion freezing is not the only ice nucleation mechanism. In convective clouds,

Deleted:

Deleted: t

Deleted:

Deleted: Large

Deleted: due to (Bigg, 1953).

474 small ice can be generated at warmer temperatures by other mechanisms (e.g.,  
475 condensation/deposition nucleation). [The ice PSDs measured by the Learjet indicates that ice](#)  
476 [observed between -7 °C and -10 °C are small, and larger frozen drops were observed at](#)  
477 [temperatures colder than -10 °C](#), but it is not known whether these large drops started to freeze  
478 before or after the small droplets, and the mechanisms that lead to drop freezing are not well  
479 understood. [In models, drop freezing is assumed instantaneous, which is not realistic, would](#)  
480 [result in warmer frozen temperatures than in real clouds, as indicated by the large temperature](#)  
481 [difference between the dashed and solid lines shown in Fig. 5.](#)

**Deleted:** The ice PSD measured by the Learjet indicates that large frozen drops were observed at colder temperatures than small ice

**Deleted:** big

### 482 3.3 Discussion

483 The above analysis indicates that [in strong updrafts, such as that sampled by the Learjet during](#)  
484 [the ICE-T project, large drops may be fully frozen at temperatures colder than their nucleation](#)  
485 [temperature. However, if the vertical air velocity is not strong enough, large drops may descend](#)  
486 or remain at the same level for long periods of time, and they may freeze if their temperature  
487 reaches the nucleation temperature. [To illustrate this, data from a C-130 penetration](#) is shown in  
488 Fig. 6. In this case, [the](#) penetration occurred approximately 500 m below the cloud top, as is  
489 indicated by the WCR reflectivity (Fig. 6a). The WCL power (Fig. 6c) quickly attenuated and the  
490 WCL depolarization ratio (Fig. 6d) is relatively low, which indicates that this cloud was  
491 dominated by liquid drops. At the flight level, the temperature (Fig. 6e) ranges from -4 °C to -  
492 4.5 °C in the updraft and is approximately -5 °C near the cloud edge. The maximum updraft  
493 velocity is 7 m/s, and the mean updraft velocity is approximately 3 m/s. The Doppler velocity  
494 (Fig. 6b) is negative in most areas of the clouds, [indicating large particles falling through the](#)  
495 [updrafts in most areas](#), and its maximum value is approximately 4 m/s, [indicating ascending](#)  
496 [large particles in the strongest updraft core](#). The 2D-C images clearly show the existence of ice

**Deleted:** frozen

**Deleted:** are

**Deleted:** observed

**Deleted:** relatively colder

**Deleted:** small ice in strong updrafts of convective clouds but that they may begin to freeze at warmer temperatures

**Deleted:** I

**Deleted:** a

**Deleted:** A

**Deleted:** n example of

**Deleted:** this

**Deleted:** falling

512 (Fig. 6f). Most of the ice particles are frozen drops and graupel, and some are needles and  
 513 columns. Considering the time that is needed for the drops to freeze and for the needles and  
 514 columns to grow through vapor diffusion, the [observed ice \(graupel, needles and columns\)](#) may  
 515 have [been](#) nucleated when the cloud top was lower than observed. [A previous statistical study](#)  
 516 [also support that large ice present at warm temperatures in developing convective clouds with](#)  
 517 [relatively weak updraft \(Yang et al., 2016\).](#)

518 The freezing of supercooled drops may be associated with some corresponding processes. For  
 519 example, drops may break up or shatter during freezing, which can produce multiple ice  
 520 fragments and splinters ([Lawson et al., 2015](#)). Mason and Maybank (1960) showed that the  
 521 freezing of a millimeter-sized drop may produce more than a hundred splinters. These ice  
 522 splinters can enhance ice initiation in convective clouds. [The Hallett-Mossop process appears to](#)  
 523 [be inefficient in the strong ICE-T convective updrafts \(Lawson et al., 2015\), but is evidently](#)  
 524 [more important in mature convective clouds with relatively weak updrafts \(Heymsfield and](#)  
 525 [Willis, 2014\).](#) [In addition](#), time-dependent freezing can have an impact on the dynamics in  
 526 developing clouds. The instantaneous freezing of a supercooled drop results in the sudden release  
 527 of a large amount of latent heat, which may lead to an overestimation of the vertical velocity in  
 528 modeled convective clouds ([Fan et al., 2015](#)). In contrast, time-dependent drop freezing can  
 529 affect the cloud dynamics in a different way because its latent heat is gradually released. This  
 530 study [points out the need to understand](#) drop freezing in convective clouds and allows us to  
 531 interpret the [deficiency of instantaneous drop freezing in cloud model up to now](#); however, it  
 532 also raises some specific questions about ice initiation [and the possible consequences of time-](#)  
 533 [dependent drop freezing on cloud evolution](#). Answering these questions requires a better  
 534 understanding of the [drop freezing mechanisms in convective clouds, which in turn requires](#)

**Deleted:** The graupel may fall from above; thus, they may start freezing at a colder temperature than the flight level temperature.

**Deleted:** is

**Deleted:** P

**Deleted:** process is

**Deleted:** it is

**Deleted:** In addition, the change in drop temperature during freezing may exert impacts on the Hallett-Mossop process. Heymsfield and Mossop (1984) showed that the Hallett-Mossop process is not only related to the ambient temperature but is also related to the graupel surface temperature. In the SBM used in this study, the Hallett-Mossop process is only parameterized for ambient temperatures between -3 °C and -8 °C. However, the Hallett-Mossop process may occur at colder ambient temperatures if the frozen drop (or graupel) surface temperature is appropriate (Heymsfield and Mossop, 1984). Fig. 3 shows that the drop temperature cools from 0 °C to its ambient temperature after being fully frozen and that the cooling rate may be even slower if there is significant riming on the surface of the particle (Phillips et al. 2015). During this process, if the drop surface temperature and other ambient conditions are suitable, the Hallett-Mossop process may occur at an air temperature that is colder than -8 °C, which could also enhance the initiation of ice in developing convective clouds. For example, a millimeter-sized frozen drop can collect approximately 600 droplets in five seconds, assuming that the droplet concentration is 50 cm<sup>-3</sup> and its diameter is 20 μm. Thus, two or three ice splinters may be produced if the ambient conditions are suitable. Moreover

**Deleted:** Future studies are needed to explore these drop freezing-related processes.

**Deleted:** reveals

**Deleted:** importance of

**Deleted:** ing

**Deleted:** observed

**Deleted:** ice PSDs

**Deleted:** For example, it is not known why the observed "primary ice" concentration is much higher than the ice nuclei concentration (DeMott et al., 2016) and the modeled ice concentration (Fig. 1). There are several possibilities for this, including the production of ice fragments and splinters during drop freezing or the Hallett-Mossop process; droplet collisional freezing (Alkezweeny, 1969); or the electrofreezing of drops (Pruppacher, 1973). In addition, it is not known whether large drops begin freezing before or after small droplets.

**Deleted:** primary

579 more laboratory experiments to be performed and more in situ measurements to be obtained in  
580 the future.

581 This study focuses on relatively warm temperatures in tropical maritime developing convective  
582 clouds, with 14 penetrations between -7 °C and -10 °C, and 6 penetrations between -10 °C and -  
583 12 °C. The sample size is relatively small, but the observations are helpful for studying the ice  
584 PSDs in tropical maritime convective clouds, at least for the clouds sampled by the Learjet  
585 during the ICE-T project. Currently, there are not many measurements of PSDs in tropical  
586 maritime developing convective clouds with strong updraft cores using the state-of-art cloud  
587 probes, especially for small ice PSDs. Clearly, more field measurements are needed in the future.

Deleted: there are

Deleted: ing

Deleted: is

Deleted: in

Deleted: and with

Deleted: , so

#### 588 4. Summary

589 In this study, the PSDs measured in fresh developing maritime convective clouds sampled during  
590 ICE-T are shown, and the deficiency of assuming instantaneous drop freezing in models is  
591 discussed. The observations in strong convective cores presented here suggest that the observed  
592 ice is primarily small at relatively warm temperature (between -7 °C and -10 °C), but the  
593 modelled ice PSDs are much broader than observed. To interpret the difference between the  
594 modelled and the observed ice PSDs, the freezing times and temperatures of supercooled drops  
595 are calculated. This analysis indicates that the freezing time is longer for large drops than it is for  
596 small drops. In strong updrafts, such as that sampled by the Learjet during ICE-T, large freezing  
597 drops may be transported to a colder temperature than their nucleation temperature before they  
598 are fully frozen. However, in models, drop freezing is assumed instantaneous, which is not  
599 realistic, and results in much broader ice PSDs at warm temperatures. Instantaneous freezing is a  
600 reasonable assumption in models if the freezing time of supercooled drops is shorter than the

Deleted: "first ice" that is observed is small

Deleted: Due to the limitations of airborne instruments, freezing drops cannot be identified until they exhibit obvious shape deformation. If the updraft is strong enough

Deleted: brought up

Deleted: begin to exhibit obvious shape deformation

613 [time step, but for simulations of convective clouds using models with relatively high temporal](#)  
614 [resolution, the time step may be shorter than the freezing time of supercooled drops, especially](#)  
615 [the large supercooled drops.](#) This study [aids in interpreting the modeled and](#) observed ice PSDs  
616 in fresh developing convective clouds, [drawing on the the perspective of the time required for](#)  
617 [drops to freeze.](#) However, the mechanisms of drop freezing and ice initiation are still not well  
618 known. Future studies are required to evaluate model simulations using time-dependent drop  
619 freezing, to understand the impact of time-dependent drop freezing on the microphysics and  
620 dynamics of convective clouds, and to further explore the mechanisms of drop freezing and ice  
621 initiation.

## 622 **Acknowledgments**

623 This work is supported by the National Science Foundation (Awards AGS-1230203 and AGS-  
624 1034858), the National Basic Research Program of China under grant no. 2013CB955802 and  
625 the DOE Grant [DE-SC0014239](#), as part of the ASR program. The authors acknowledge the crew  
626 of the NCAR C-130 and the SPEC Learjet for collecting these data and providing high-quality  
627 products. [We](#) thank Drs. Paul Lawson and Sarah Woods for processing and sharing the data of  
628 particle size distributions measured by Learjet.

629

Deleted: allows us to

Deleted: from

Deleted: freezing

Deleted: DE-SC0006974

Deleted: T



635 **References**

- 636 Baumgardner, D. and co-authors: Airborne instruments to measure atmospheric aerosol particles,  
637 clouds and radiation: A cook's tour of mature and emerging technology. *Atmospheric*  
638 *Research*, 102, 10-29, 2011.
- 639 Bigg, E. K.: The formation of atmospheric ice crystals by the freezing of droplets. *Quarterly*  
640 *Journal of the Royal Meteorological Society*, 79, 510-519, 1953.
- 641 Cantrell, W., and Heymsfield, A.: Production of ice in tropospheric clouds: A review. *Bulletin of*  
642 *the American Meteorological Society*, 86(6), 795-807, 2005.
- 643 DeMott, P. J. and co-authors: Sea spray aerosol as a unique source of ice nucleating  
644 particles. *Proceedings of the National Academy of Sciences*, 113, 5797-5803, 2016.
- 645 Dye, J. E., and Hobbs, P. V.: The influence of environmental parameters on the freezing and  
646 fragmentation of suspended water drops. *Journal of the Atmospheric Sciences*, 25, 82-96, 1968.
- 647 Foote, G. B., and Du Toit, P. S.: Terminal velocity of raindrops aloft. *Journal of Applied*  
648 *Meteorology*, 8, 249-253, 1969.
- 649 Hallett, J. and Mossop, S. C.: Production of secondary ice particles during the riming  
650 process. *Nature*, 249, 26-28, 1974.
- 651 Fan, J., Liu, Y. C., Xu, K. M., North, K., Collis, S., Dong, X., Zhang, G. J., Chen, Q., Kollias, P.  
652 and Ghan, S. J., Improving representation of convective transport for scale-aware  
653 parameterization: 1. Convection and cloud properties simulated with spectral bin and bulk  
654 microphysics. *Journal of Geophysical Research: Atmospheres*, 120, 3485-3509, 2015.

**Deleted:** Alkezweeny, A. J.: Freezing of supercooled water droplets due to collision. *Journal of Applied Meteorology*, 8, 994-995, 1969. .

658 [Heymsfield, A. J.: A comparative study of the rates of development of potential graupel and hail](#)  
659 [embryos in High Plains storms. Journal of the Atmospheric Sciences, 39, 2867-2897, 1982](#)

660 Heymsfield, A., and Willis, P.: Development of first ice hydrometeors and secondary ice in a  
661 tropical oceanic deep convective cloud system near Africa. AIP Conference Proceedings, 1527,  
662 972-975, 2013.

663 Heymsfield, A. J., and Willis, P.: Cloud conditions favoring secondary ice particle production in  
664 tropical maritime convection. J. Atmos. Sci., 71, 4500–4526, 2014.

665 Hindmarsh, J. P., Russell, A. B., and Chen, X. D.: Experimental and numerical analysis of the  
666 temperature transition of a suspended freezing water droplet. International Journal of Heat and  
667 Mass Transfer, 46, 1199-1213, 2003.

668 Johnson, D. A., and Hallett, J.: Freezing and shattering of supercooled water drops. Quarterly  
669 Journal of the Royal Meteorological Society, 94, 468-482, 1968.

670 Khain, A., Ovtchinnikov, M., Pinsky, M., Pokrovsky, A., and Krugliak, H.: Notes on the state-  
671 of-the-art numerical modeling of cloud microphysics. Atmospheric Research, 55, 159-224, 2000.

672 Khain, A. P. and co-authors: Representation of microphysical processes in cloud-resolving  
673 models: Spectral (bin) microphysics versus bulk parameterization. Reviews of Geophysics, 53,  
674 247-322, 2015.

675 Kumjian, M. R., Ganson, S. M., and Ryzhkov, A. V.: Freezing of raindrops in deep convective  
676 updrafts: A microphysical and polarimetric model. Journal of the Atmospheric Sciences, 69,  
677 3471-3490, 2012.

678 Lawson, P. R., Woods, S., and Morrison, H.: The microphysics of ice and precipitation  
679 development in tropical cumulus clouds. *J. Atmos. Sci.*, 72, 2429-2445, 2015.

680 Lynn, B. H., Khain, A. P., Dudhia, J., Rosenfeld, D., Pokrovsky, A., and Seifert, A.: Spectral  
681 (bin) microphysics coupled with a mesoscale model (MM5). Part I: Model description and first  
682 results. *Monthly Weather Review*, 133, 44-58, 2005.

683 Mason, B. J. and Mayabnk, J.: The fragmentation and electrification of freezing water drops.  
684 *Quarterly Journal of the Royal Meteorological Society*, 86, 176-185, 1960.

685 Meyers, M. P., DeMott, P. J., and Cotton, W. R.: New primary ice-nucleation parameterizations  
686 in an explicit cloud model. *Journal of Applied Meteorology*, 31, 708-721, 1992.

687 [Murray, W. A., and List, R.: Freezing of water drops. \*Journal of Glaciology\*, 11, 415-429, 1972.](#)

688 Phillips, V. T., Khain, A., Benmoshe, N., Ilotoviz, E., and Ryzhkov, A.: Theory of time-  
689 dependent freezing. Part II: Scheme for freezing raindrops and simulations by a cloud model  
690 with spectral bin microphysics. *Journal of the Atmospheric Sciences*, 72, 262-286, 2015.

691 Pruppacher, H. R. and Klett, J. D.: *Microphysics of clouds and precipitation*. Atmospheric and  
692 Oceanographic Sciences Library, 954 pp, 2010.

693 Rangno, A. L., and Hobbs, P. V.: Microstructures and precipitation development in cumulus and  
694 small cumulonimbus clouds over the warm pool of the tropical Pacific Ocean. *Quarterly Journal*  
695 *of the Royal Meteorological Society*, 131, 639-673, 2005.

696 Wang, Z., Wechsler, P., Kuestner, W., French, J., Rodi, A., Glover, B., Burkhart, M., and  
697 Lukens, D.: Wyoming cloud lidar: Instrument description and applications. *Opt. Express*, 17,

**Deleted:** Pruppacher, H. R.: Electrofreezing of supercooled water. *Pure and Applied Geophysics*, 104, 623-634, 1973. .

700 13576–13587, 2009.

701 Wang, Z. and co-authors: Single aircraft integration of remote sensing and in situ sampling for  
702 the study of cloud microphysics and dynamics. *Bull. Amer. Meteor. Soc.*, 93, 653–668, 2012.

703 Yang, J., Wang, Z., Heymsfield, A. J., and Luo, T.: Liquid-Ice Mass Partition in Tropical  
704 Maritime Convective Clouds. *J. Atmos. Sci.*, 73, 4959-4978, 2016.

705 Yao, S. C. and Schrock, V. E.: Heat and mass transfer from freely falling drops. *Journal of Heat*  
706 *Transfer*, 98, 120-126, 1976.

707

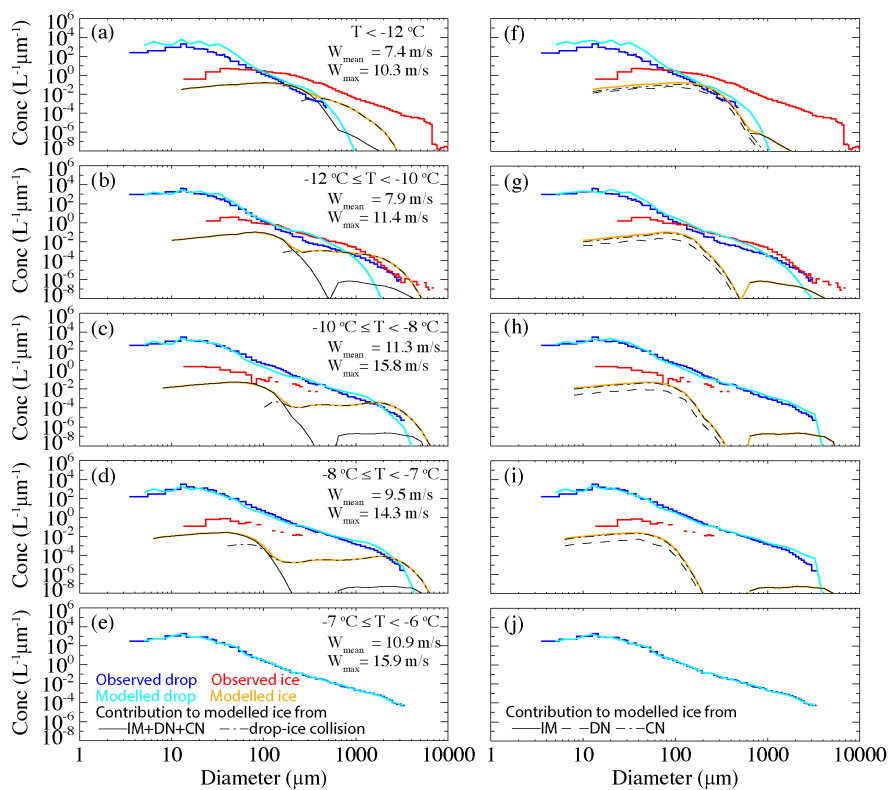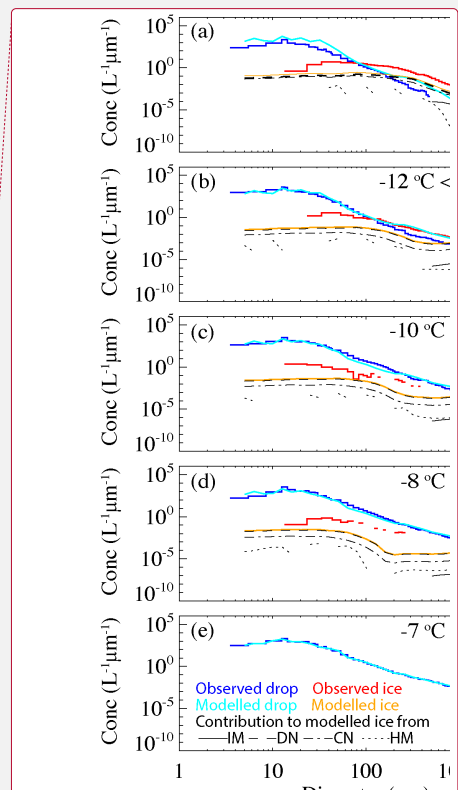

Figure 1. Particle size distributions in fresh developing convective clouds observed by the Learjet during ICE-T and those modeled using a parcel model with SBM. In (a)-(e), all of the ice physics implemented in the SBM are included; in (f)-(j), drop-ice collision is excluded. The black solid, dashed, and dashed-dotted lines in (f)-(j) represent the contributions from immersion freezing (IM), deposition/condensation nucleation (DN), and contact nucleation (CN) respectively, to the modeled ice size distributions. The black solid and dashed-dotted lines in (a)-(e) represent the contributions from primary ice nucleation (IM+DN+CN) and drop-ice collision, respectively, to the modeled ice size distributions. The observed mean vertical velocity ( $W_{\text{mean}}$ ) and averaged maximum vertical velocity ( $W_{\text{max}}$ ) are shown in (a)-(e).

- Deleted:**
- Formatted:** Font:(Default) Times, Font color: Text 1
- Formatted:** Font:(Default) Times
- Formatted:** Line spacing: 1.5 lines
- Deleted:** the left panels
- Deleted:** the right panels
- Deleted:** liquid
- Deleted:** , and dotted
- Deleted:** , and the Hallett-Mossop process (HM)
- Deleted:**
- Formatted:** Subscript

(a)  $-10 \leq T < -13$  °C, 2D-C images

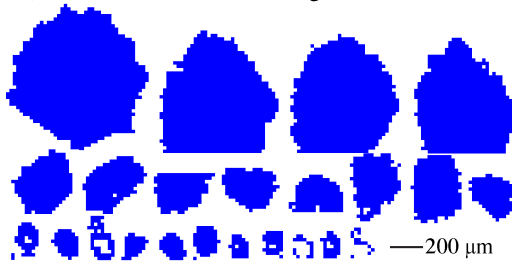

(b)  $-10 \leq T < -13$  °C, CPI images

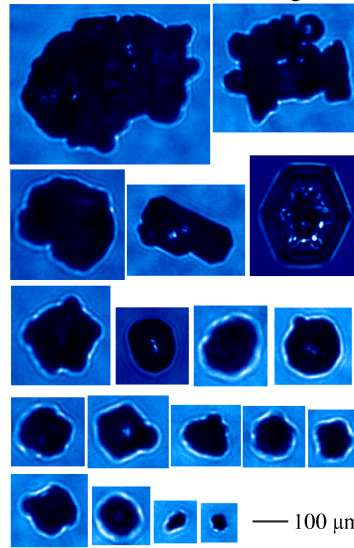

(c)  $-8 < T < -10$  °C, CPI images

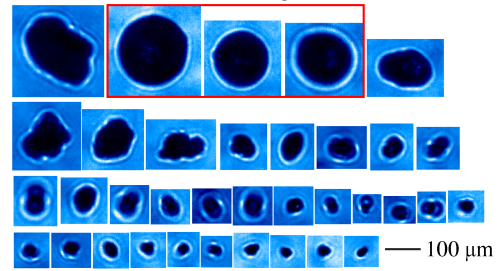

Figure 2. Examples of the 2D-C and CPI images measured in the developing convective clouds sampled during the ICE-T project.

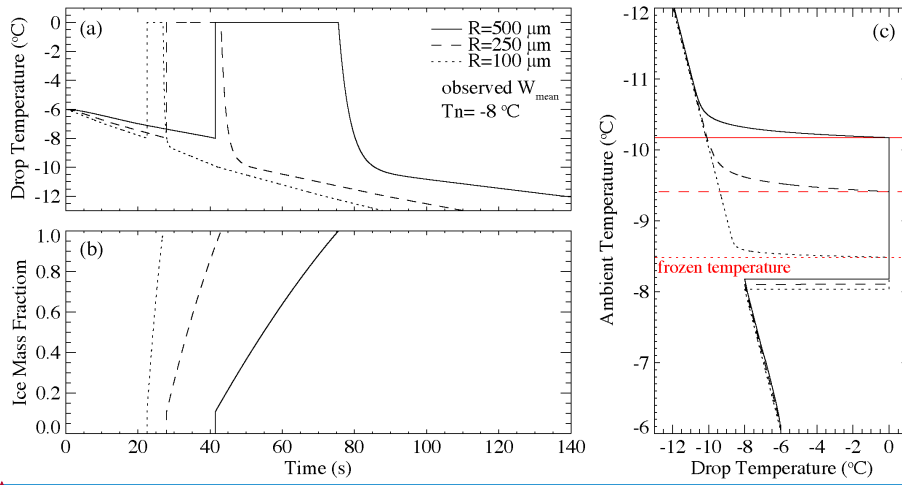

Figure 3. (a) Changes in drop temperature over time for drops with different radii based on the observed mean vertical velocity, which is temperature-dependent. Nucleation temperature ( $T_n$ ) is  $-8\text{ }^\circ\text{C}$ ; (b) same as (a) but for ice mass fraction; (c) ambient temperature versus drop temperature for drops with different radii. The red solid, dashed and dotted lines indicate the frozen temperature for drops with radius of  $500\text{ }\mu\text{m}$ ,  $250\text{ }\mu\text{m}$  and  $100\text{ }\mu\text{m}$ , respectively.

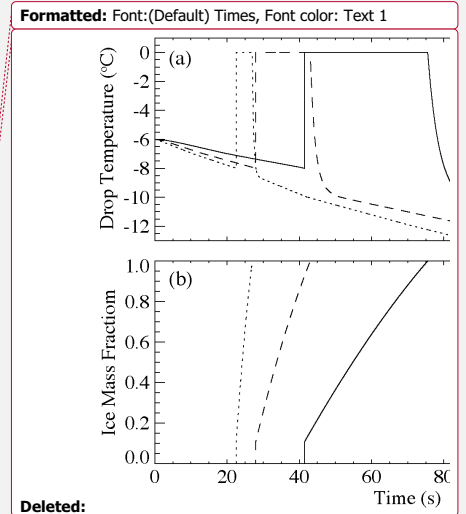

Deleted: Vertical air velocity (W) is assumed to be 10 m/s and n

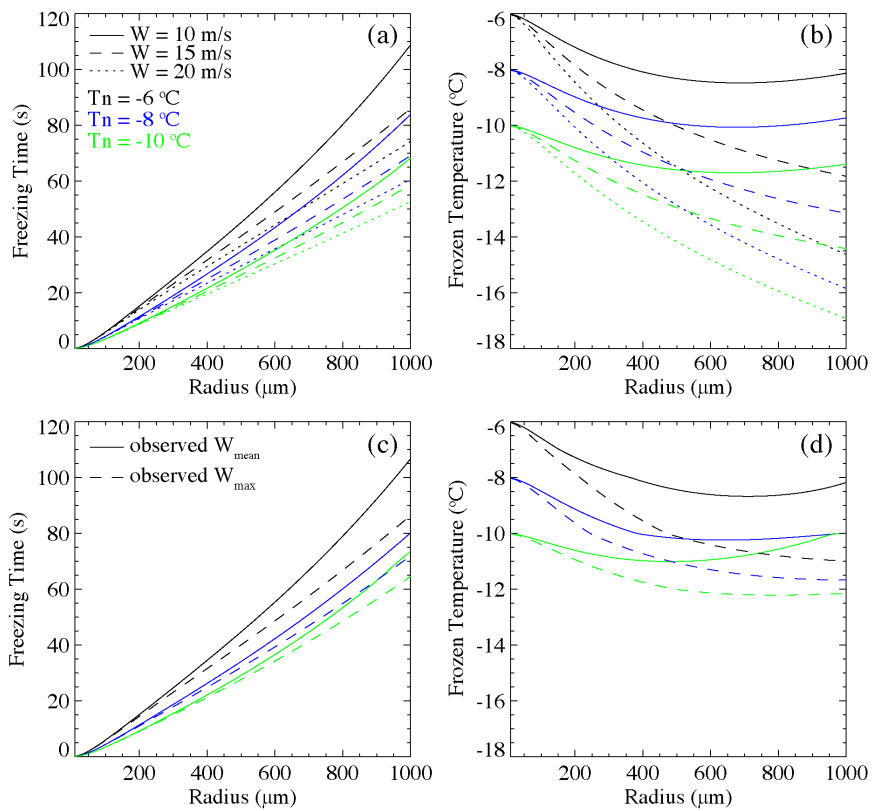

Figure 4. (a) Freezing time and (b) frozen temperature as functions of drop radius for different values of vertical air velocity ( $W$ ) and nucleation temperature ( $T_n$ ). (c) and (d) are the same as (a) and (b) but for the observed mean vertical velocity ( $W_{\text{mean}}$ ) and averaged maximum vertical velocity ( $W_{\text{max}}$ ), which are temperature-dependent.

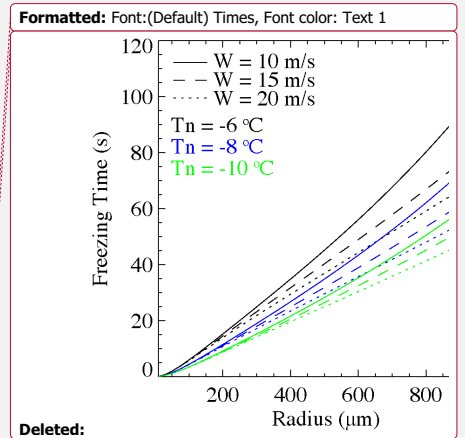

Formatted: Subscript

Deleted: .



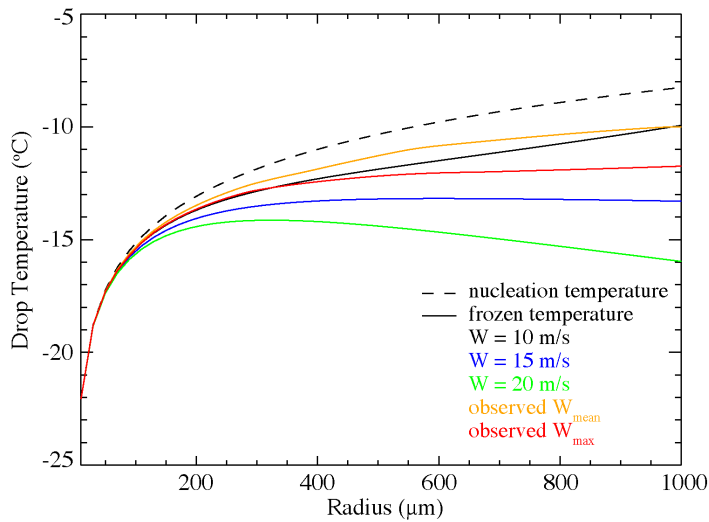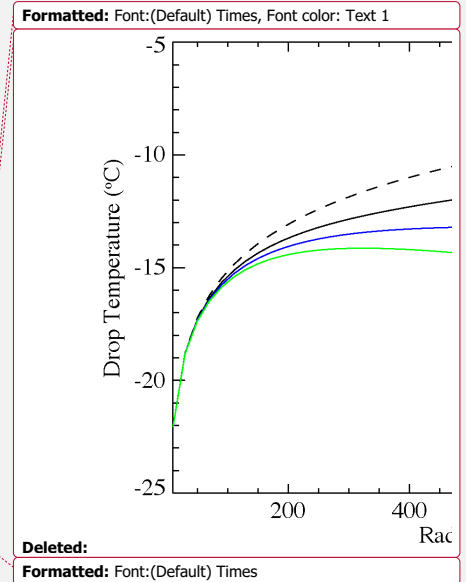

Figure 5. Drop temperature as a function of drop radius for different vertical air velocity ( $W$ ) values, including the observed mean vertical velocity ( $W_{\text{mean}}$ ) and averaged maximum vertical velocity ( $W_{\text{max}}$ ), which are temperature-dependent. The nucleation temperature is the temperature at which drops have a  $10^{-4}\%$  probability of freezing, as determined based on Bigg's parameterization for immersion freezing.

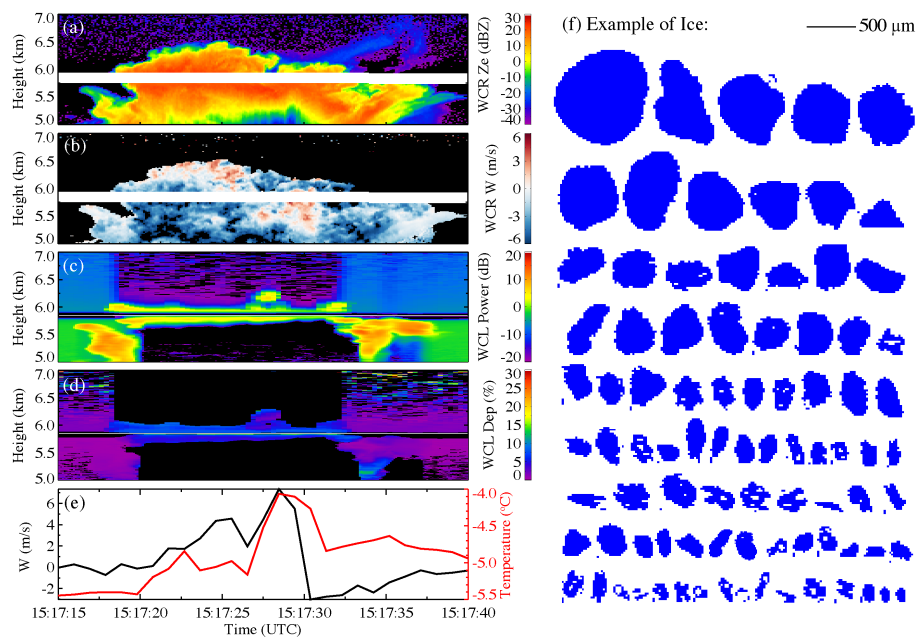

Figure 6. An example of the penetration of the C-130 in a developing cloud sampled on 23 July 2011: (a) WCR reflectivity; (b) WCR Doppler velocity; (c) WCL power; (d) WCL depolarization ratio; (e) ambient temperature and in situ vertical air velocity; and (f) examples of ice particles measured using 2D-C.
